# Supplementary material for: Autopsy and Cardiac Magnetic Resonance Image Case of Bevacizumab-Related Cardiomyopathy
Source: MDPI journal article supplement (doi:10.3390/jcdd9070208), 2022-07-01
Supplement: s1 [file s1]

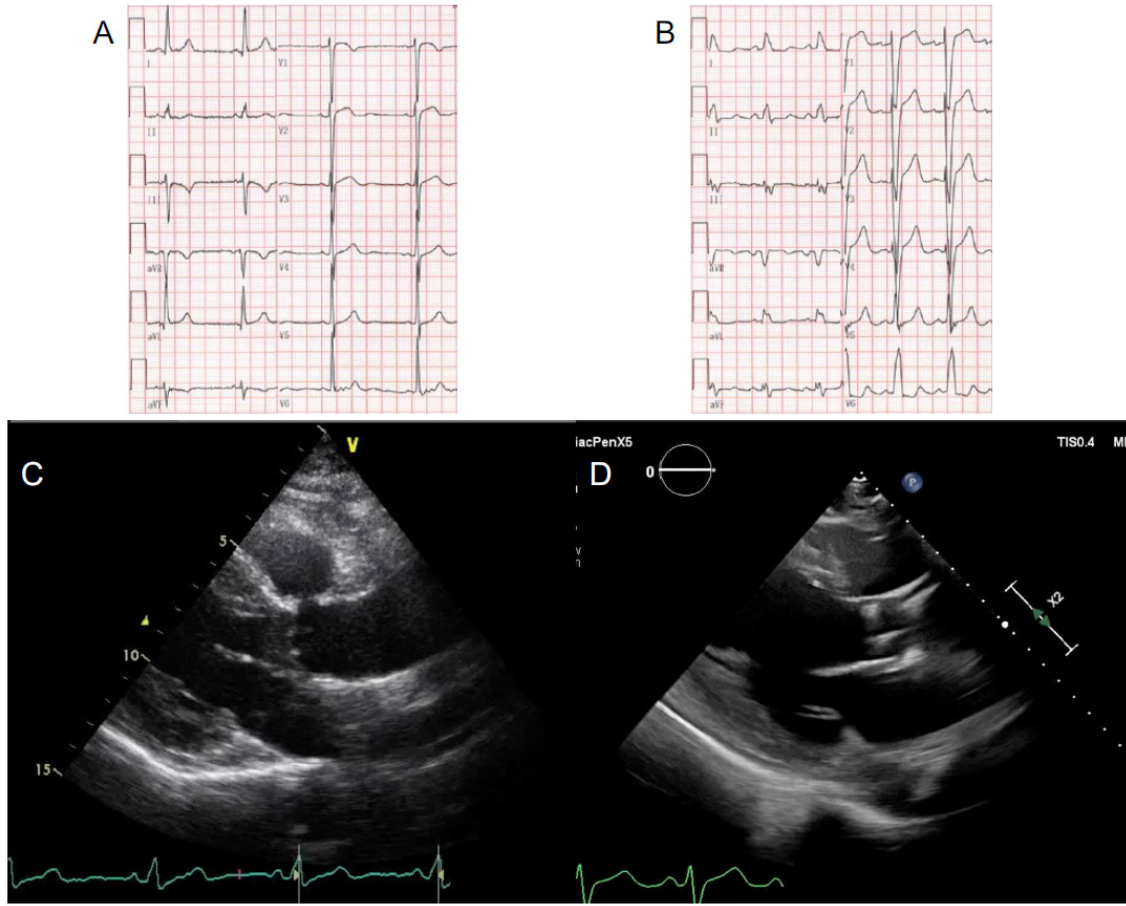

**Figure S1.** Changes in electrocardiogram and echocardiogram before and after bevacizumab treatment. Although an electrocardiogram (ECG) before chemotherapy showed only nonspecific T-wave abnormality (**A**), the ECG at the development of heart failure changed to a left bundle branch block pattern (**B**). On the other hand, an echocardiogram before chemotherapy showed mild left ventricular (LV) systolic dysfunction (LV ejection fraction 47%) (**C**), but the echocardiogram at the development of heart failure showed LV enlargement (LV end-diastolic dimension 71 mm) and severe LV systolic dysfunction (LV ejection fraction 17%) (**D**).
